# Supplementary material
Source: HighWire-hosted journal article supplement (https://ajnr-sso.highwirestaging.com/highwire/filestream/62439/field_highwire_adjunct_files/0/18-00260.pdf)
Supplement: 18-00260.pdf [file 18-00260.pdf]

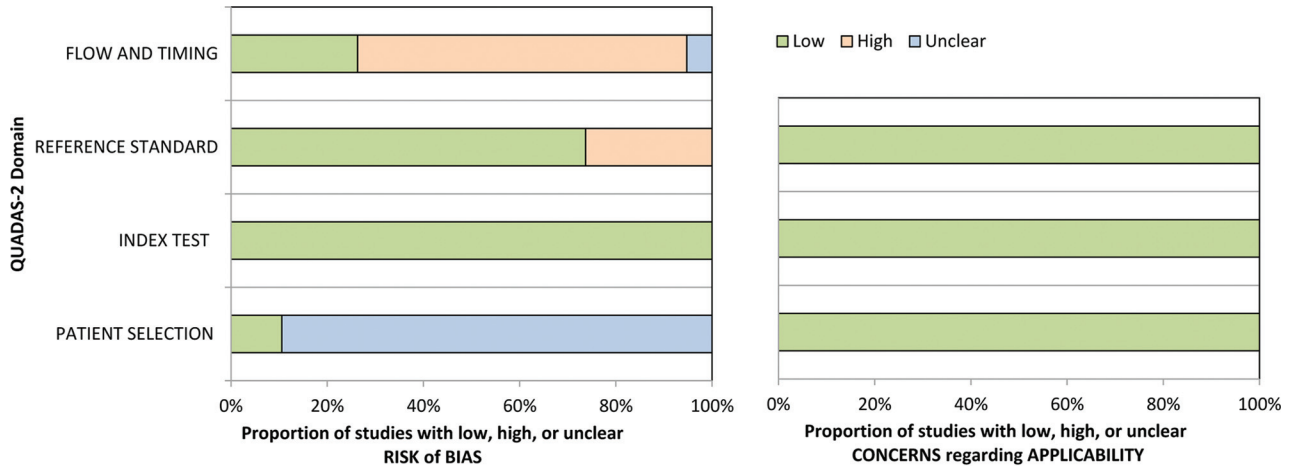

**ON-LINE FIG 1.** Quality assessment using QUADAS-2. Grouped bar charts demonstrate the risk of bias and concerns about applicability.

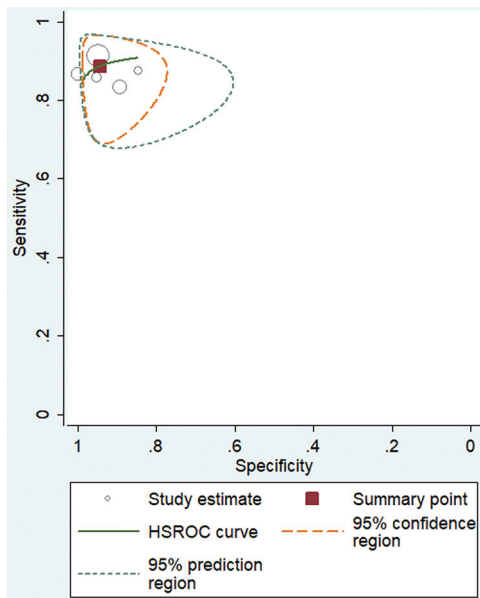

**ON-LINE FIG 2.** Hierarchic summary receiver operating characteristic curve of the diagnostic performance of MR imaging for the diagnosis of TDLs.

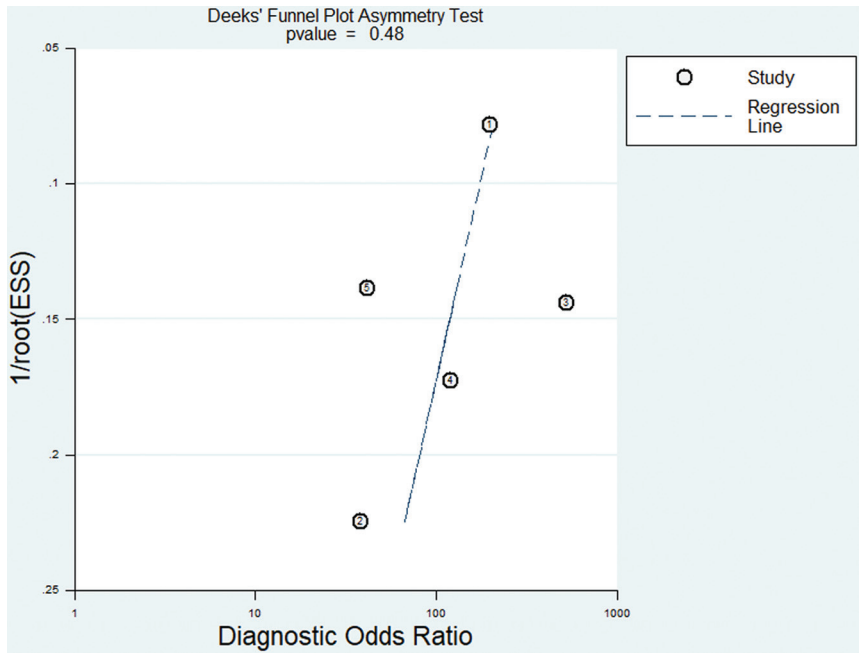

**ON-LINE FIG 3.** The Deeks funnel plot for publication bias. The *P* value of .56 suggests that the likelihood of publication bias is low.
